# Supplementary material for: Phosphazenes: efficient organocatalysts for the catalytic hydrosilylation of carbon dioxide
Source: Royal Society of Chemistry journal article supplement (doi:10.1039/c5cc01282a), 2015-01-01

Supporting Information for:  
**Phosphazenes: Efficient Organocatalysts for the Catalytic  
Hydrosilylation of Carbon Dioxide**

Marc-André Courtemanche,<sup>a</sup> Marc-André Légaré<sup>a</sup>, Étienne Rochette<sup>a</sup>, and Frédéric-Georges  
Fontaine<sup>\*a</sup>

Département de Chimie, Université Laval, 1045 Avenue de la Médecine  
Québec, QC, Canada, G1V 0A6.

\*Email : [frederic.fontaine@chm.ulaval.ca](mailto:frederic.fontaine@chm.ulaval.ca)

Contents

|                                                                            |            |
|----------------------------------------------------------------------------|------------|
| <b>S0</b> ...General Experimental.....                                     | <b>S2</b>  |
| <b>S1</b> ...Initial test experiment in benzene- <i>d</i> 6.....           | <b>S3</b>  |
| <b>S2</b> ...Reaction of <b>1</b> with CO <sub>2</sub> .....               | <b>S4</b>  |
| <b>S3</b> ...Reaction of <b>2</b> with CO <sub>2</sub> .....               | <b>S7</b>  |
| <b>S4</b> ...Reaction of <b>3</b> with CO <sub>2</sub> .....               | <b>S10</b> |
| <b>S5</b> ...Catalytic reduction using <sup>13</sup> CO <sub>2</sub> ..... | <b>S13</b> |
| <b>S6</b> ...Kinetics of the reduction with various amounts of silane..... | <b>S18</b> |
| <b>S7</b> ...Reaction with 5 atm. of CO <sub>2</sub> .....                 | <b>S20</b> |
| <b>S8</b> ...General procedures for catalytic screening.....               | <b>S21</b> |

**S0: General experimental:**

While no particular precautions were made to avoid contact with air for most of the catalytic reactions, the phosphazene bases and the preparation of the catalytic experiments have been handled under an inert atmosphere of dinitrogen. Reactions were carried either in a sealed J-Young NMR tube, in which case NMR conversions are indicated, or in standard oven dried vials or schlenk vessels. Benzene- $d_6$  was purified by vacuum distillation from Na/K alloy, bone dry  $CO_2$  was purchased from Praxair and used as received.  $^{13}CO_2$  (99% isotope label) was purchased from Cambridge Isotope Laboratories and stored over  $CaCl_2$ . Phosphazene bases, solvents, DMF- $d_7$  and silanes were purchased from Sigma Aldrich and used as received without further purification

NMR spectra were recorded on Agilent Technologies NMR spectrometer at 500 MHz ( $^1H$ ), 125.758 MHz ( $^{13}C$ ), 202.456 MHz ( $^{31}P$ ) 160.46 MHz, a Varian Inova NMR AS400 spectrometer, at 400.0 MHz ( $^1H$ ), 100.580 MHz ( $^{13}C$ ), 161.923 MHz ( $^{31}P$ ), or on a Bruker NMR AC-300 at 300MHz ( $^1H$ ), 75.435 MHz ( $^{13}C$ ), 121.442 MHz ( $^{31}P$ ).  $^1H$  NMR and  $^{13}C\{^1H\}$  NMR chemical shifts are referenced to residual protons in deuterated solvent. Multiplicities are reported as singlet (s), broad singlet (s, br) doublet (d), triplet (t), multiplet (m). Chemical shifts are reported in ppm. Coupling constants are reported in Hz. gHSQC experiments were performed in order to confirm C-H correlations. GC-MS characterization was carried out using a Thermo Scientific trace GC ultra coupled with a ITQ 900 mass spectrometer using electronic impact (EI) ionization.

**WARNING:** Condensation of high pressure of  $CO_2$  might lead to an explosion of the glassware. Care should be taken.

**S1:** Initial test experiment:

7.8 mg (0.028 mmol) of **1** along with 26.2 mg (0.142 mmol) of  $\text{Ph}_2\text{SiH}_2$  were dissolved in benzene- $d_6$  and introduced into a gas tight J-Young NMR tube.  $\text{CO}_2$  was added by freezing the solution in a liquid nitrogen bath and leaving the sample under vacuum for *ca* 3 minutes. The liquid nitrogen bath was removed and the sample was left to warm up for 20 seconds after which  $\text{CO}_2$  was introduced into the tube. The sample was then heated at  $80^\circ\text{C}$  in an oil bath after which it was analyzed by NMR spectroscopy.

**Figure S1:** Spectrum of the reaction described in **S1** and select regions, showing the formation of  $\text{CO}_2$  reduction products

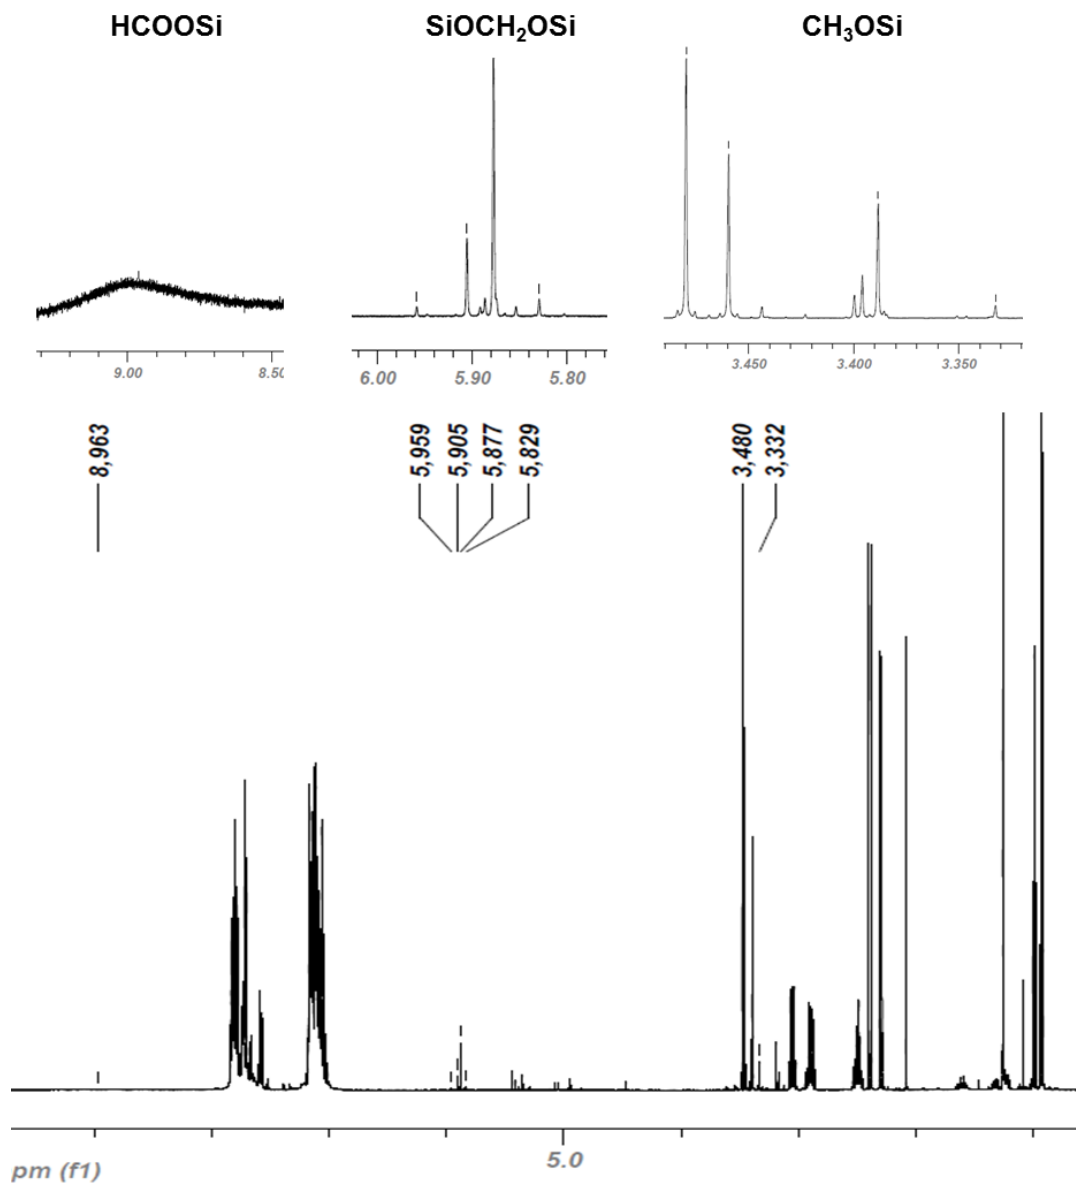

## S2: Rearrangement of **1** to **4**

200 mg of **1** (0.73 mmol) were placed in a sealable schlenk tube along with 1mL of toluene. The solution was frozen in liquid nitrogen and CO<sub>2</sub> was introduced following the procedure described in **S1**. The reaction was heated at 80 °C for 12 hours after which the volatiles were removed in vacuo, yielding pure **4** as colorless oil, 150mg, Yield = 94% (crude)

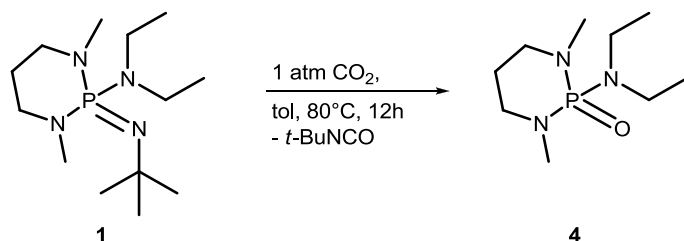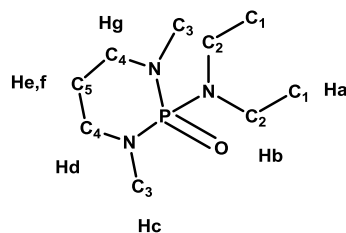

**4**: <sup>1</sup>H NMR 500MHZ: δ 3.07 (m, 4H, H<sub>d</sub>); 2.9 (m, 2H, H<sub>d</sub> or H<sub>g</sub>); 2.48 (m, 2H, H<sub>d</sub> or H<sub>g</sub>); 2.39 (d, <sup>3</sup>J<sub>P-H</sub>:11.0Hz, 6H, H<sub>c</sub>); 1.60 (m, 1H, He or Hf); 1.20 (m, 1H, He or Hf); 0.99 (t, <sup>3</sup>J<sub>H-H</sub>=7.1 Hz, 6H, Ha). <sup>13</sup>C {<sup>1</sup>H} (126 MHz): δ 51.0 (s, 2C, C<sub>3</sub>); 39.7 (d, <sup>2</sup>J<sub>P-C</sub>=5.3Hz, 2C, C<sub>2</sub>); 35.5 (s, 2C, C<sub>4</sub>); 26.3 (s, 1C, C<sub>5</sub>); 14.4 (s, 2C, C<sub>1</sub>). <sup>31</sup>P {<sup>1</sup>H} (202MHz): δ 21.8 (s, 1P).

MS (EI):

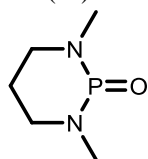

calcd:147.14  
found:147.21

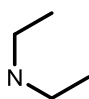

calcd:72.13  
found:72.17

Figure S2A:  $^1\text{H}$  NMR spectra of **4**

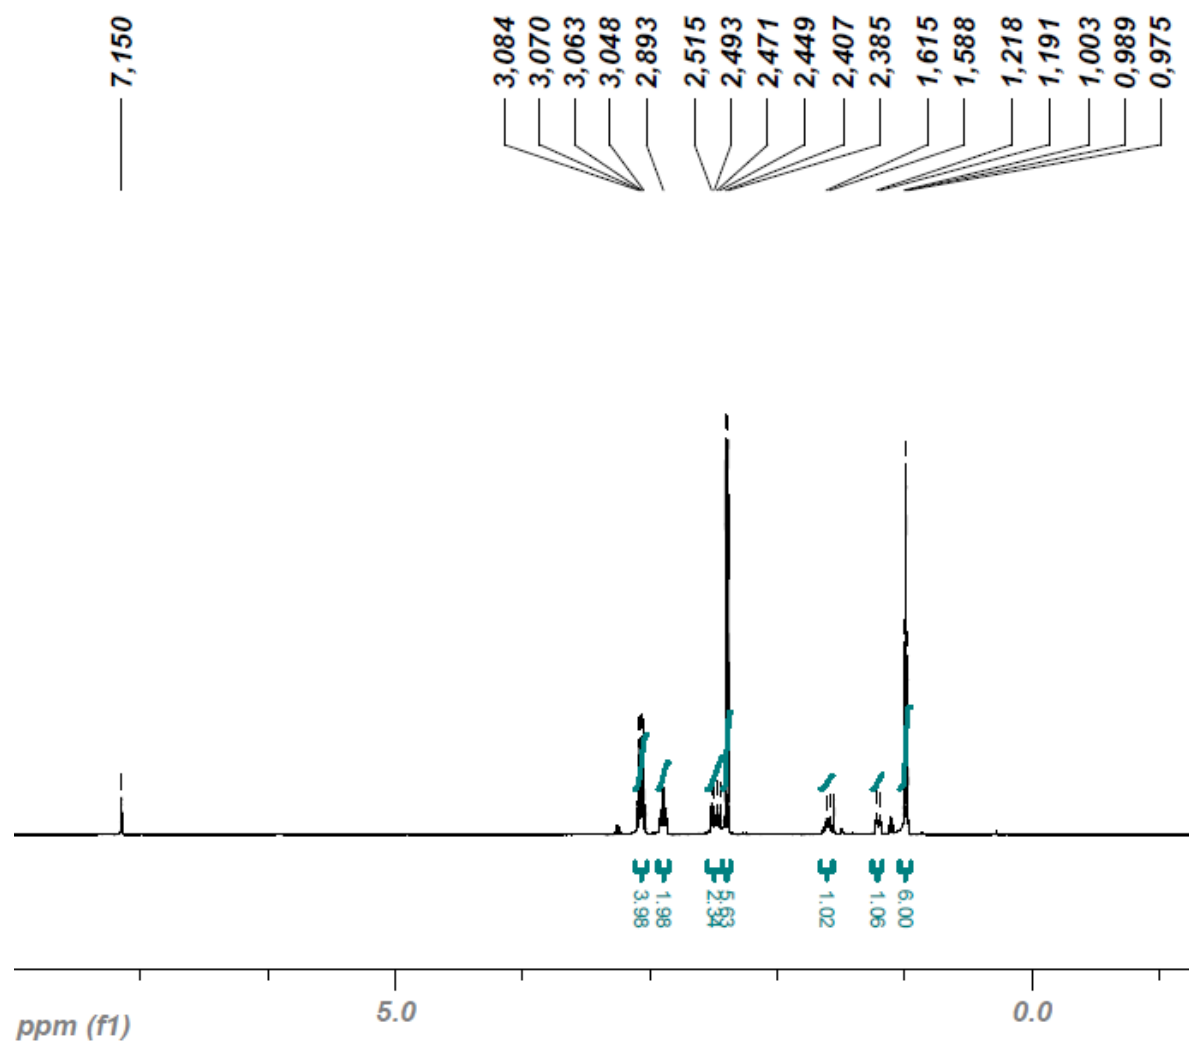

**Figure S2B:**  $^{31}\text{P}$   $\{^1\text{H}\}$  NMR spectra of **4**

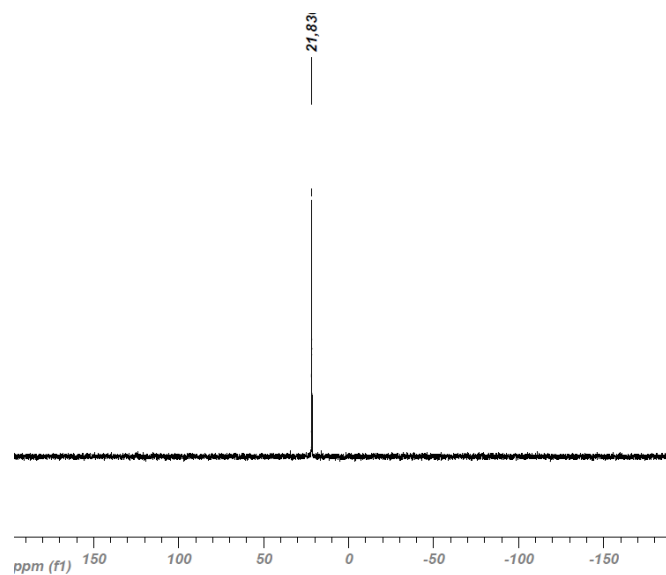

**Figure S2C:**  $^{13}\text{C}$   $\{^1\text{H}\}$  NMR spectra of **4**

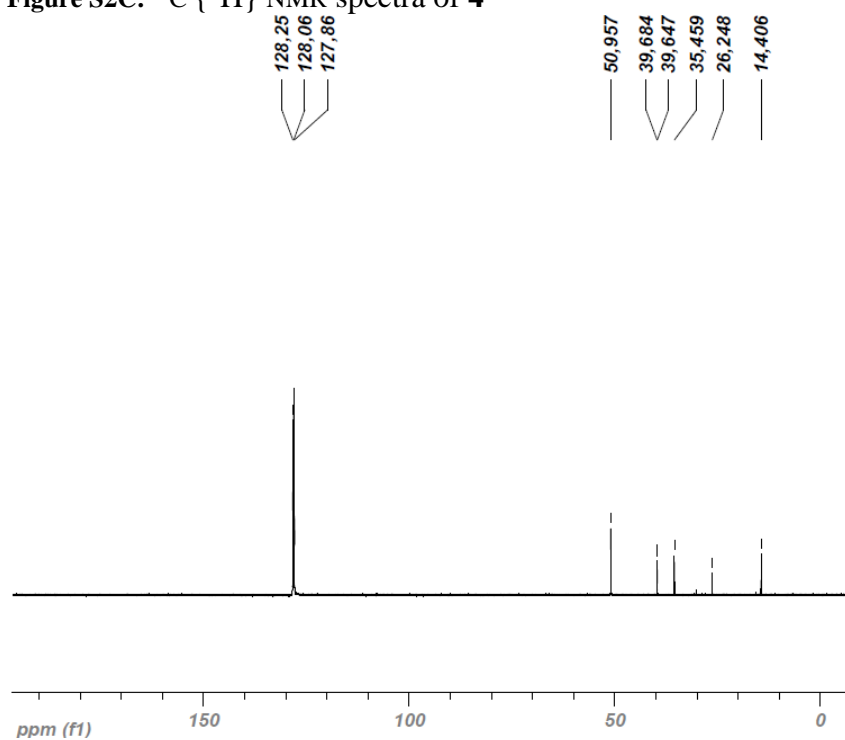

**S3: Reaction of 2 with CO<sub>2</sub>**

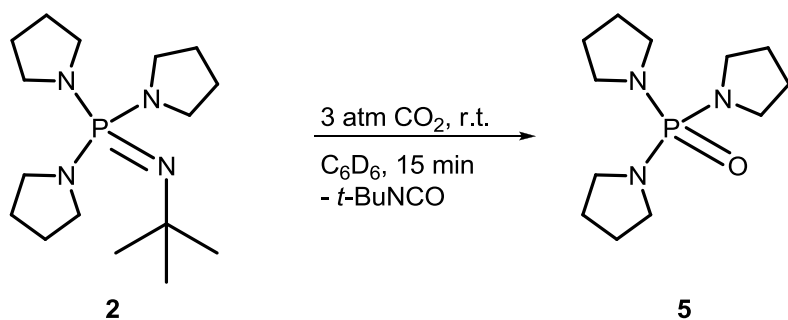

6.5 mg (0.021 mmol) of **2** were dissolved in 0.4 mL of benzene-*d*<sub>6</sub> and exposed to CO<sub>2</sub> following the procedure described in **S1**. The compound was left to react for 15 minutes after which the volatiles were removed in vacuo and the sample redissolved in benzene-*d*<sub>6</sub>. Yield = quantitative (by NMR).

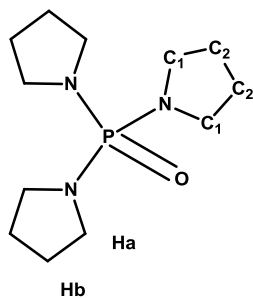

**5**: <sup>1</sup>H NMR 500MHZ: δ 3.11 (m, 12H, H<sub>a</sub>); 1.5 (m, 12H, H<sub>b</sub>). <sup>13</sup>C {<sup>1</sup>H} (126 MHz): δ 46.7 (d, 12C, <sup>2</sup>J<sub>P-C</sub>=5.3Hz); 26.7 (d, 12C, <sup>3</sup>J<sub>P-C</sub>=7.6 Hz). <sup>31</sup>P {<sup>1</sup>H} (202MHz): δ 14.9 (s, 1P)

MS (EI):

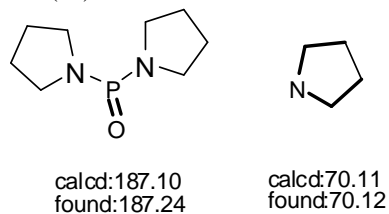

**Figure S3A:**  $^1\text{H}$  NMR of **5**

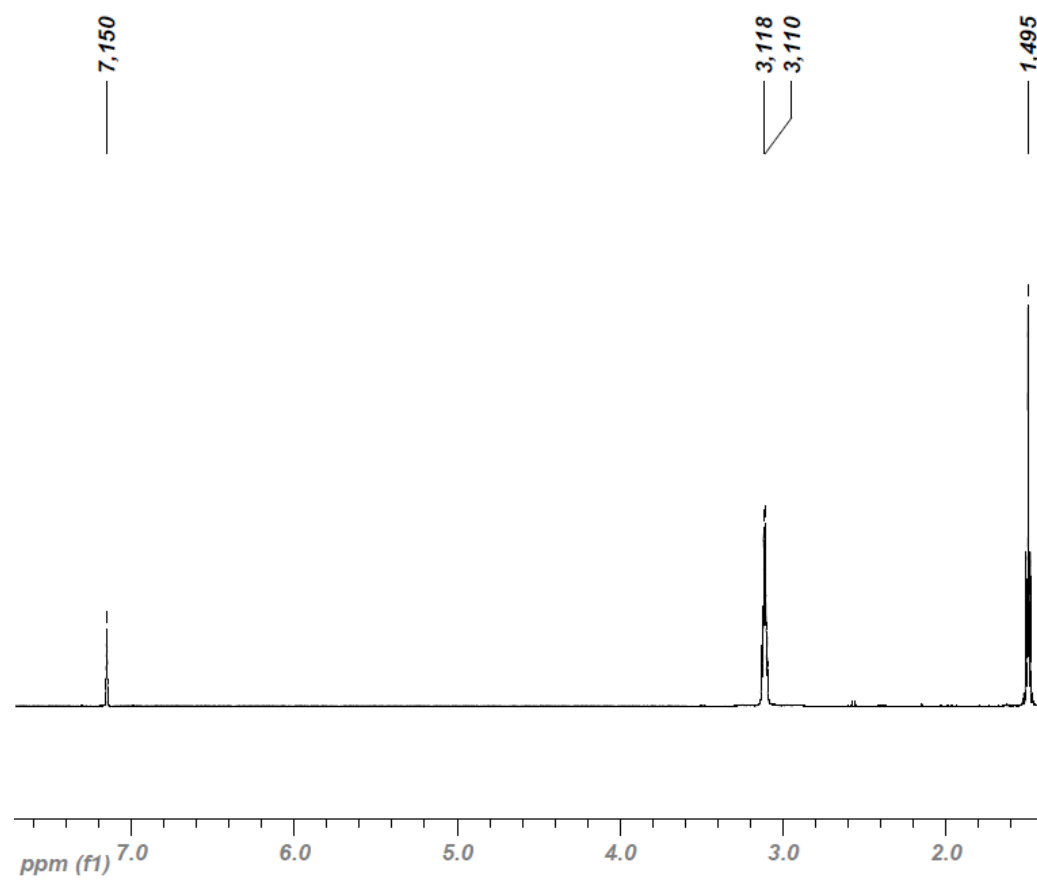



**Figure S3B:**  $^{13}\text{C}$  { $^1\text{H}$ } NMR of **5**

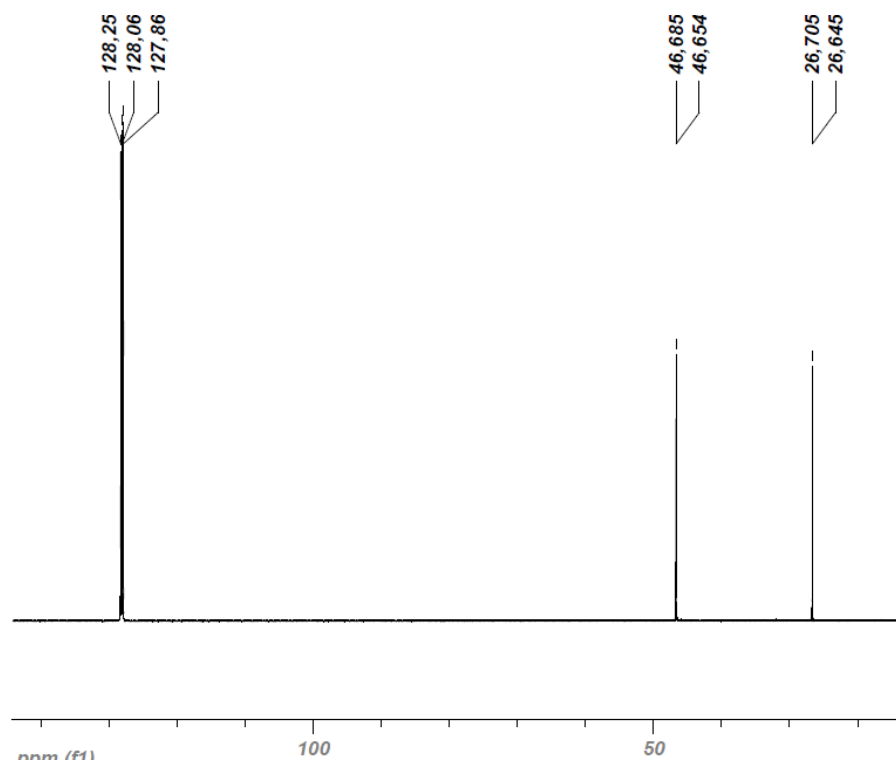

**Figure S3C:**  $^{31}\text{P}$  { $^1\text{H}$ } NMR of **5**

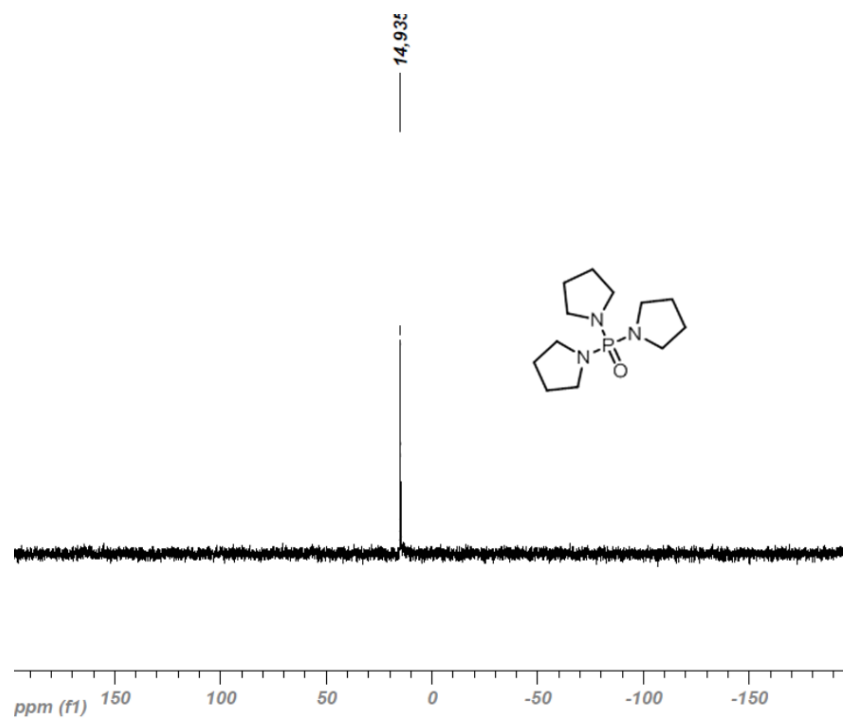

**S4** Reaction of **3** with CO<sub>2</sub>.

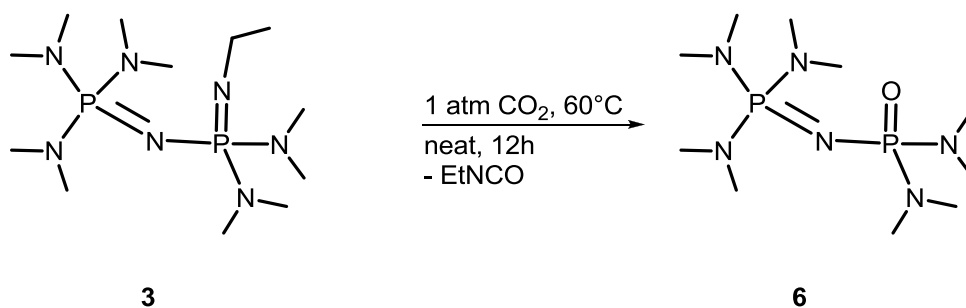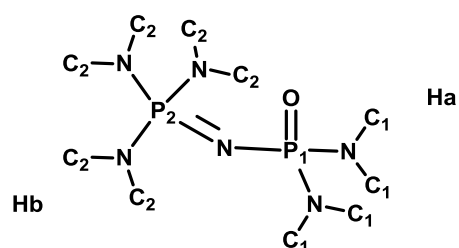

208 mg of **3** (0.61 mmol) was introduced in a vial (with no cap) which was deposited at the bottom of a Schlenk tube. The Schlenk tube was put under a constant flow of carbon dioxide in an oil bath maintained at 60 °C overnight. After 12 hours of reaction ,the volatiles were removed in vacuo, yielding 189 mg of crude **6** (Yield =99%).

**6:** <sup>1</sup>H NMR 500MHZ: δ 2.8 (d, <sup>3</sup>J<sub>P-H</sub>=10.8 Hz, 18H, H<sub>b</sub>); 2.42 (d, <sup>3</sup>J<sub>P-H</sub>=9.4 Hz, 12H, H<sub>b</sub>). <sup>13</sup>C {<sup>1</sup>H} (126 MHz): δ 38.2 (bs, 4C, C<sub>1</sub>); 37.1 (bs, 6C, C<sub>2</sub>). <sup>31</sup>P{<sup>1</sup>H} (202MHz): δ 22.5 (d, <sup>2</sup>J<sub>P-P</sub>=43.0 Hz 1P, P1); 12.4 (d, <sup>2</sup>J<sub>P-P</sub>=43.0 Hz 1P, P2).

MS (EI): (**6** -NMe<sub>2</sub>)

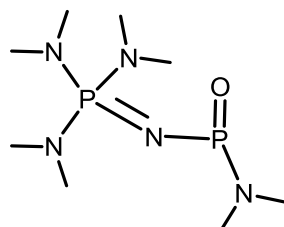

calcd: 268.15  
found: 268.4

**Figure S4A:**  $^1\text{H}$  NMR of **6**

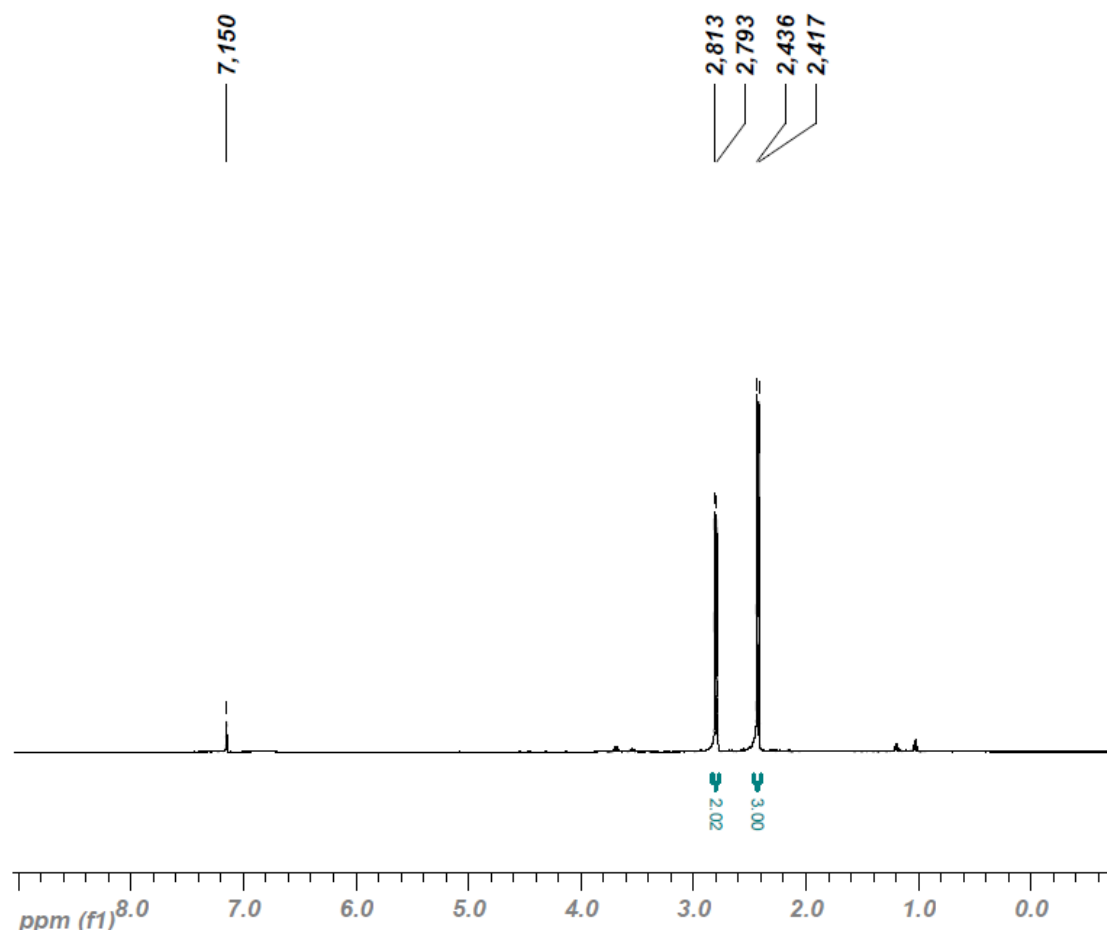

**Figure S4B:**  $^{31}\text{P} \{^1\text{H}\}$  NMR of **6**

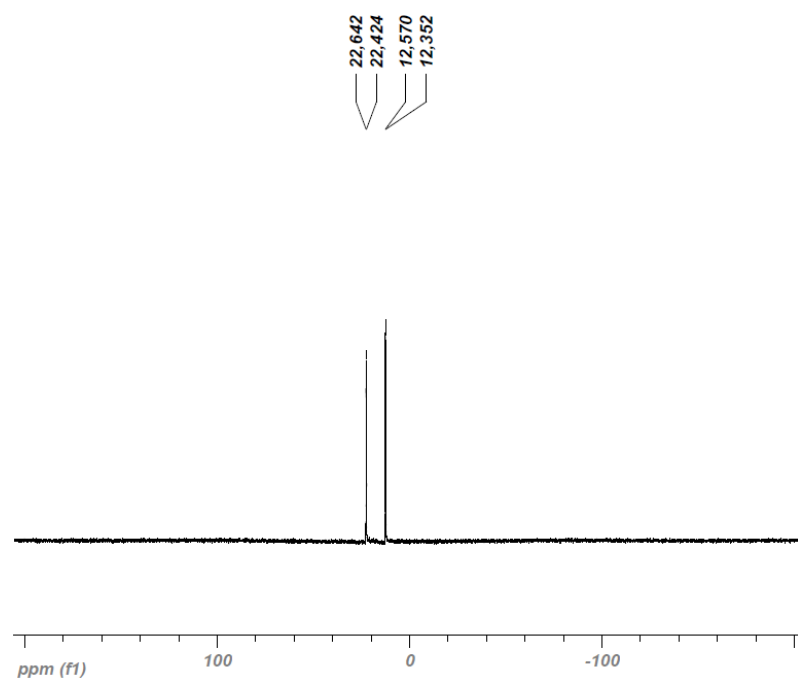

**Figure S4C:**  $^{13}\text{C} \{^1\text{H}\}$  NMR of **6**

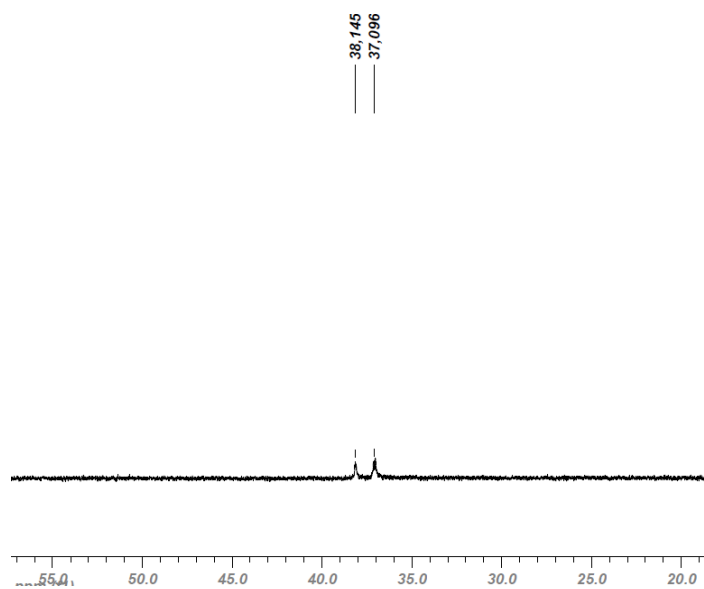

**S5:** Catalytic reduction using  $^{13}\text{CO}_2$ .

2.1 mg of **1** (7.6  $\mu\text{mol}$ ) as well as 28.7 mg (0.157 mmol) of  $\text{Ph}_2\text{SiH}_2$  were dissolved in 0.4 ml of  $\text{DMF-}d_7$  after which 2  $\mu\text{L}$  of  $\text{C}_6\text{H}_{12}$  (internal standard) were added. The solution was transferred to a J-Young NMR tube which was frozen in a liquid nitrogen bath. The J-Young was left under vacuum for 30 minutes after which  $\sim 3$  atm of  $^{13}\text{CO}_2$  were condensed in the tube. The solution was left to warm at r.t. naturally and analyzed by  $^1\text{H}$ ,  $^{31}\text{P}\{^1\text{H}\}$ , and  $^{13}\text{C}\{^1\text{H}\}$  NMR spectroscopy at regular intervals.

**Figure S5A:**  $^1\text{H}$  NMR spectra after 30 minutes of the reaction described in S5.

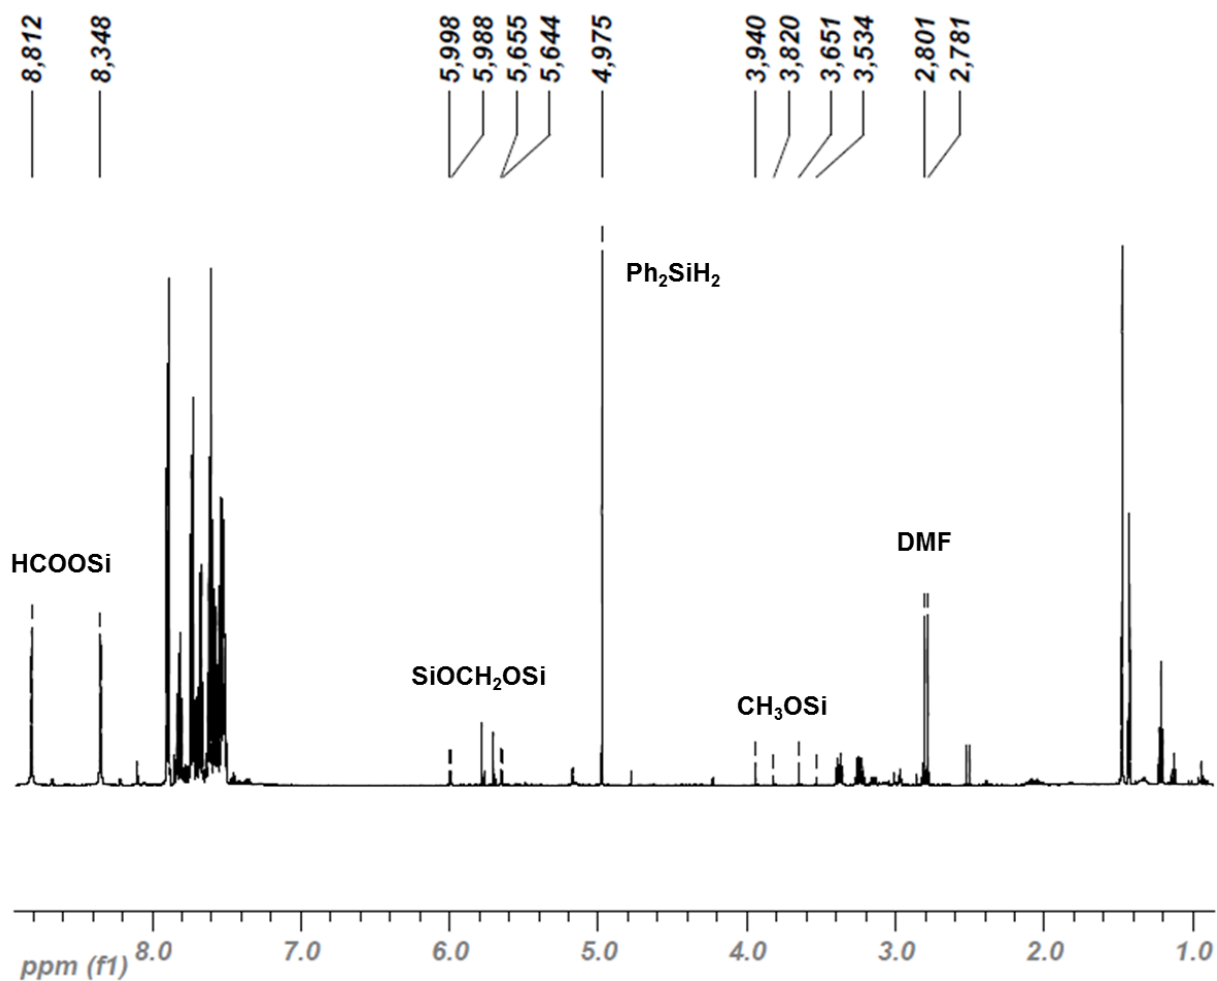

**Figure S5B:**  $^{31}\text{P}$   $\{^1\text{H}\}$  NMR spectra after 30 minutes of the reaction described in **S5**.

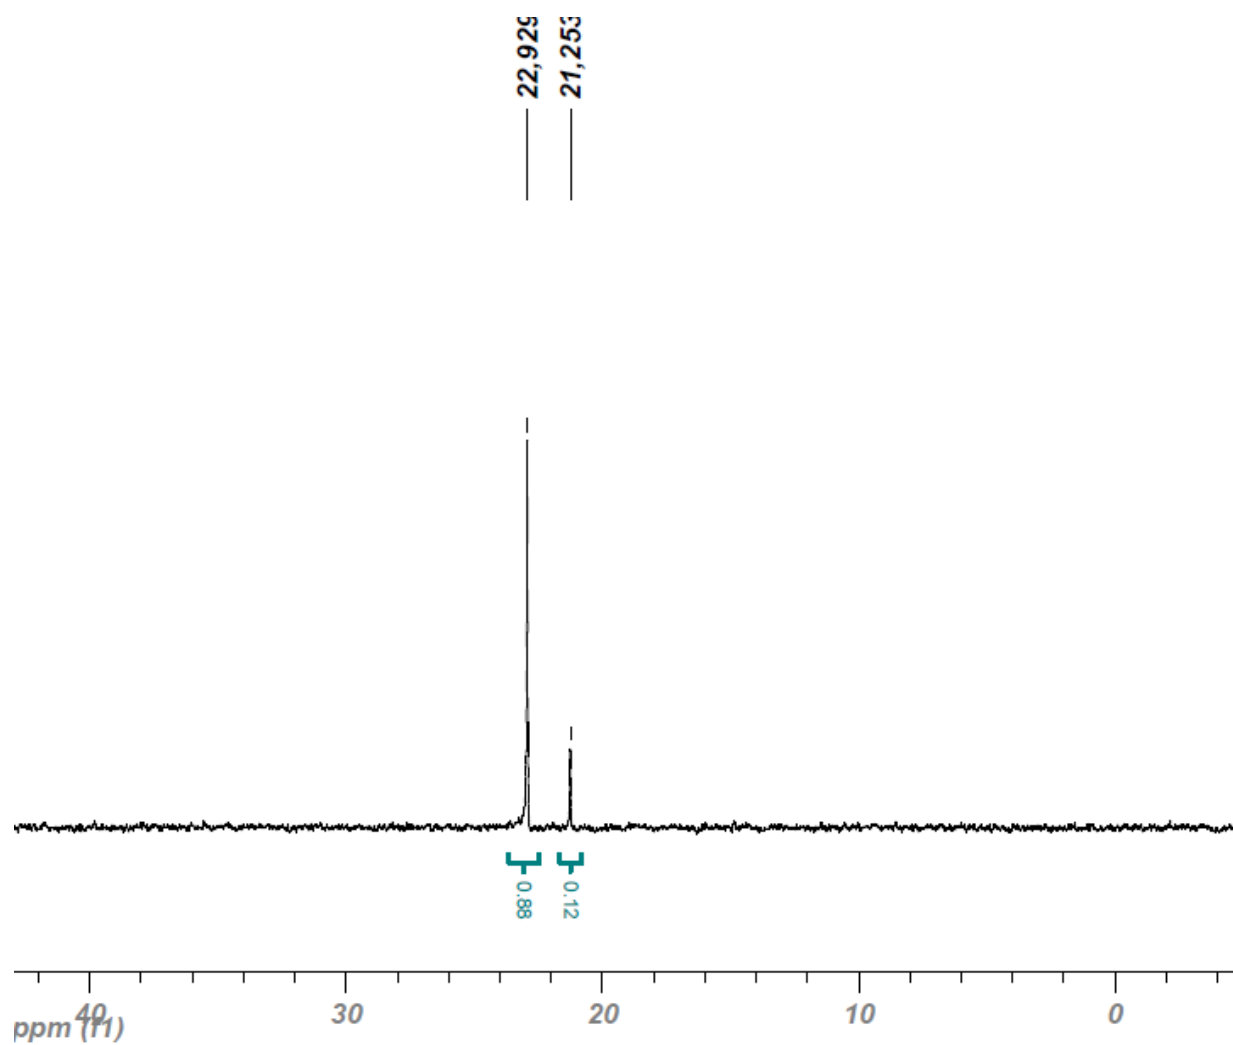

**Figure S5C:**  $^{13}\text{C}\{^1\text{H}\}$  NMR and selected regions

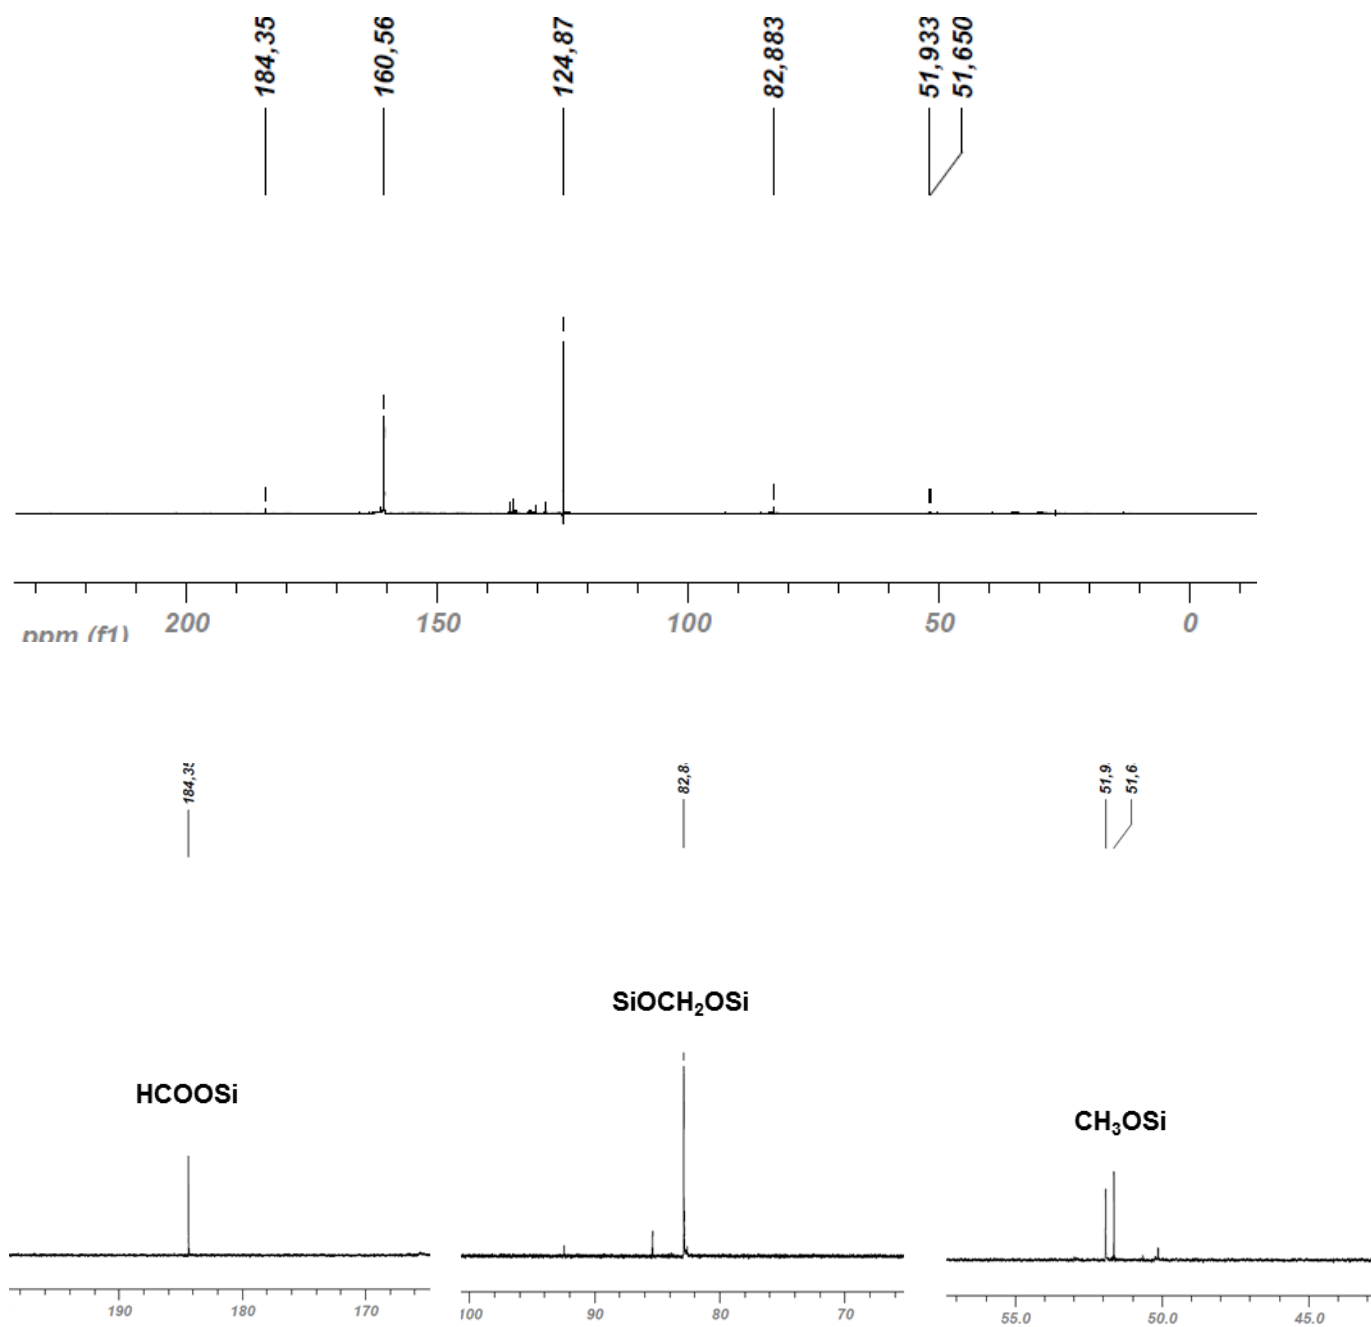

Upon completion of the reaction (total consumption of silanes), the sample was degassed by a series of 3 freeze pump thaws and another loading of silane, 28.7 mg (0.157 mmol) was added to the reaction mixture. The sample was left to react for 36 hours after which the solution was once again analyzed by  $^1\text{H}$ ,  $^{31}\text{P}\{^1\text{H}\}$  and  $^{13}\text{C}\{^1\text{H}\}$  NMR spectroscopy.

**Figure S5D:**  $^1\text{H}$  NMR spectra and select regions 36 hours after the addition of the second loading of silane

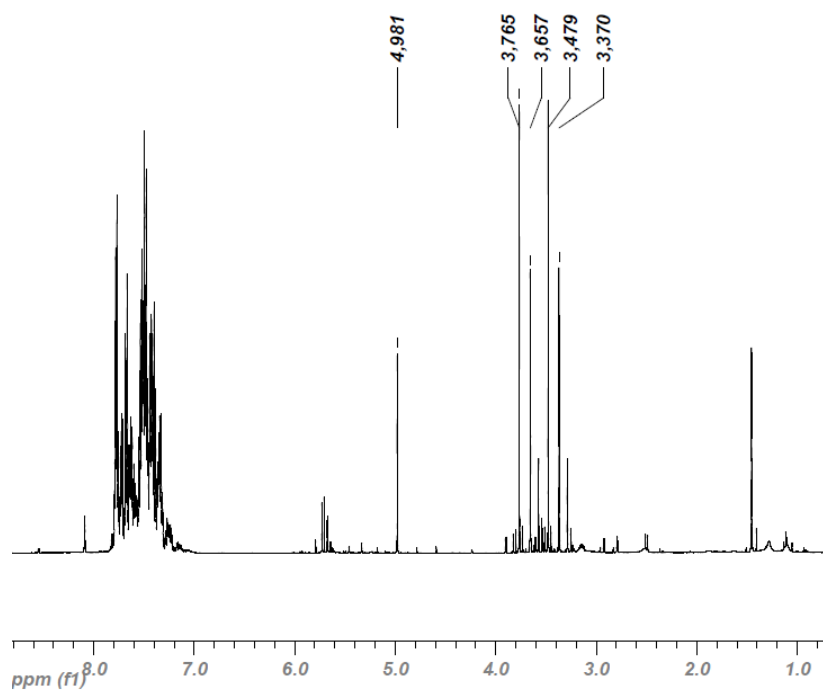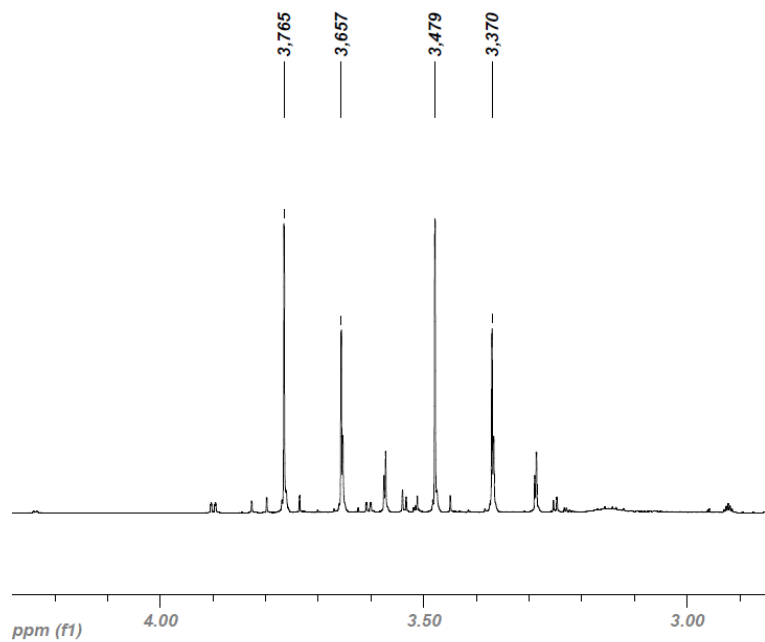



**Figure S5E:**  $^{31}\text{P}\{^1\text{H}\}$  NMR spectra 36 hours the addition of the second loading of silane

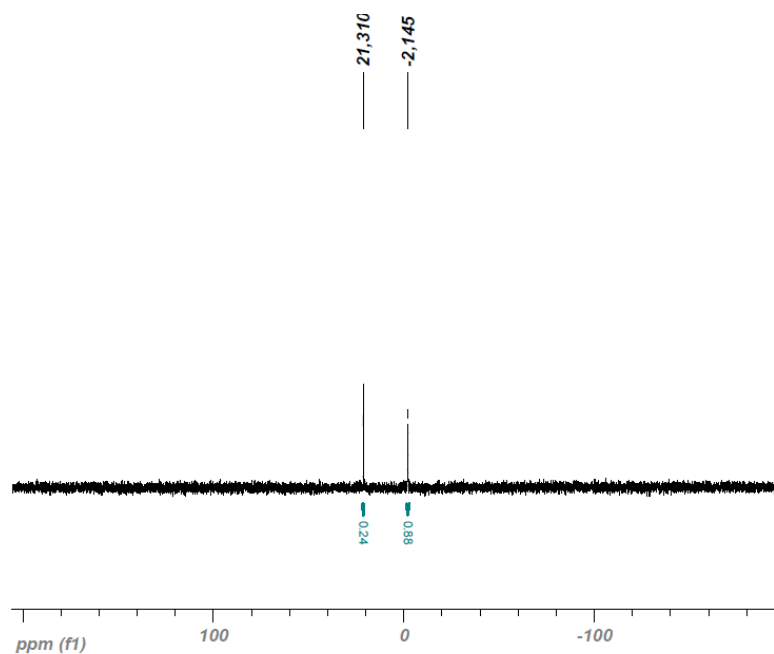

**Figure S5F:**  $^{13}\text{C}\{^1\text{H}\}$  NMR spectra 36 hours after the addition of the second loading of silane

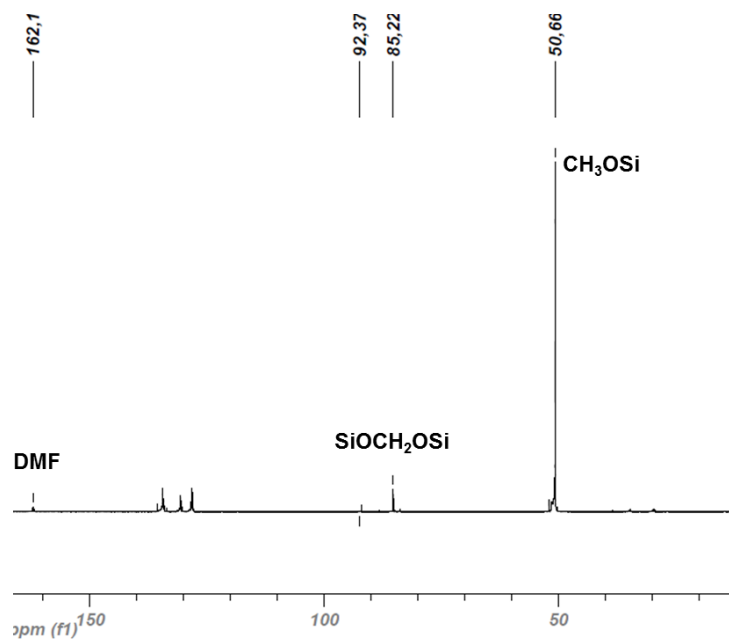

**S6:** Following the reaction in DMF, with various loadings of silane:

Preparation of the mother liquor: a 12.5  $\mu\text{mol/ml}$  solution has been prepared by dissolving 17.0 mg of **1** in 5.0 ml (4.74 g) of DMF.

0.4 ml of the mother liquor described in **S8** (5.2  $\mu\text{mol}$  of **1**) was introduced in a J-Young NMR tube along with 38.4 mg (0.1 mmol) (Test A), 96.0 mg (0.52 mmol) (Test B) of  $\text{Ph}_2\text{SiH}_2$ . Then,  $\text{CO}_2$  was added following the procedure described in S1. The samples were left to warm up at r.t. for 10 minutes before starting the acquisition at r.t. The reaction was followed by  $^1\text{H}$  NMR spectroscopy and the intensity of the integration plotted against time for both reactions in the graphs presented below:

**Figure S6A: Test A**

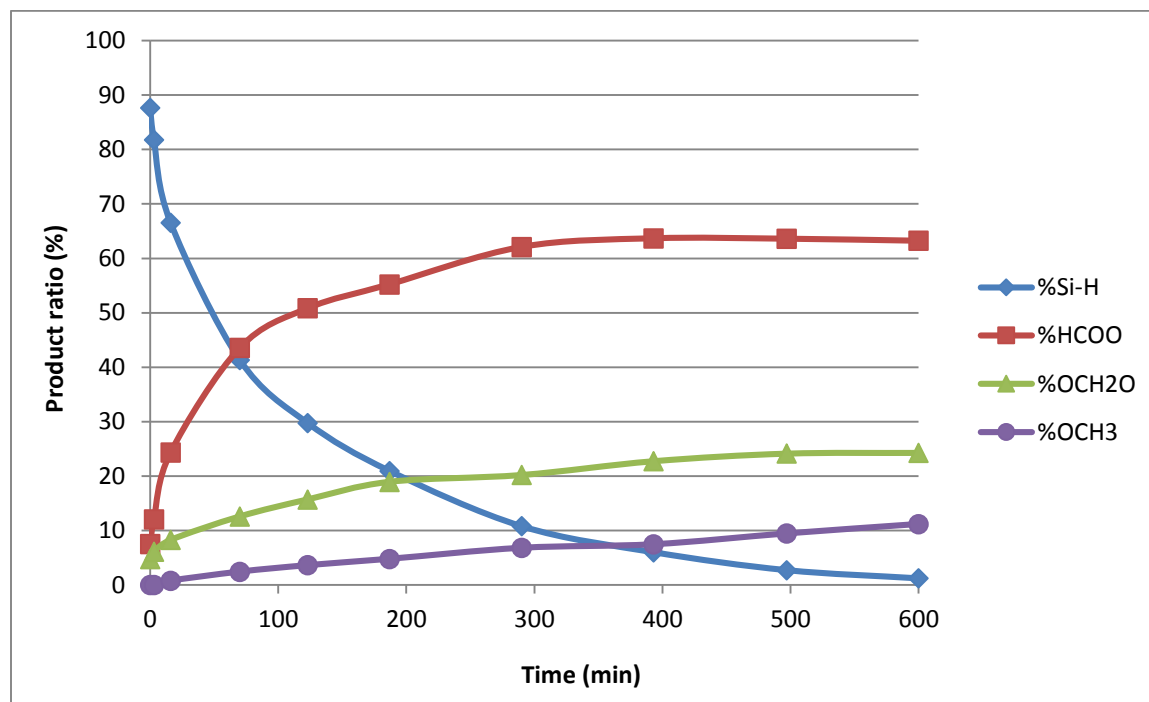

Figure S2b: Test B

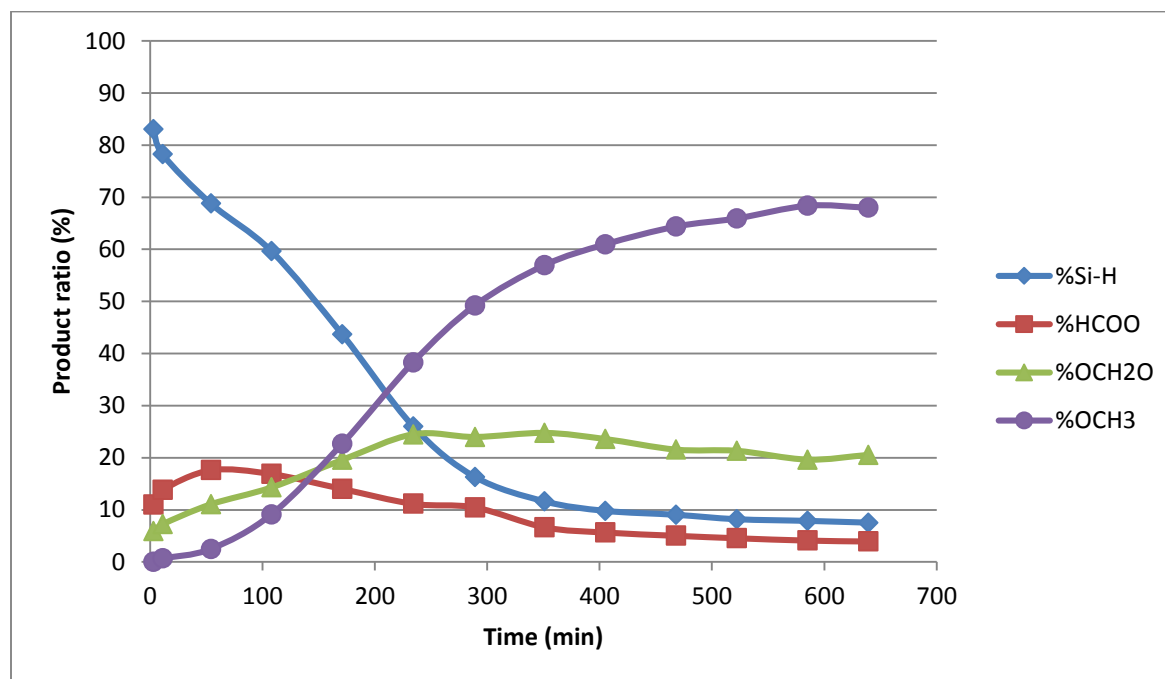

In this test, the CO<sub>2</sub> was depleted due to the presence of a large excess of silane, explaining why the methoxide derivatives appear as the predominant product.

**S7:** Reaction under 5 atm. of CO<sub>2</sub>

0.4 ml of the mother liquor described in S8 was introduced in a 1.0 mL vial along with 38.4 mg of Ph<sub>2</sub>SiH<sub>2</sub> (0.1 mmol). *ca* 0.5 mL of benzene-*d*<sub>6</sub> was added to the solution as well as a magnetic stir bar. The vial was placed inside a 170 mL Fischer porter vessel. The vessel was frozen in a liquid nitrogen bath and put under vacuum for 60 minutes, after which 5 atm was condensed in the fischer porter vase. The liquid nitrogen bath was removed and replaced with a water bath at r.t. After 2 hours of reaction, the solution was analyzed by <sup>1</sup>H NMR spectroscopy.

**Figure S7A:** <sup>1</sup>H NMR spectra of the reaction described above.

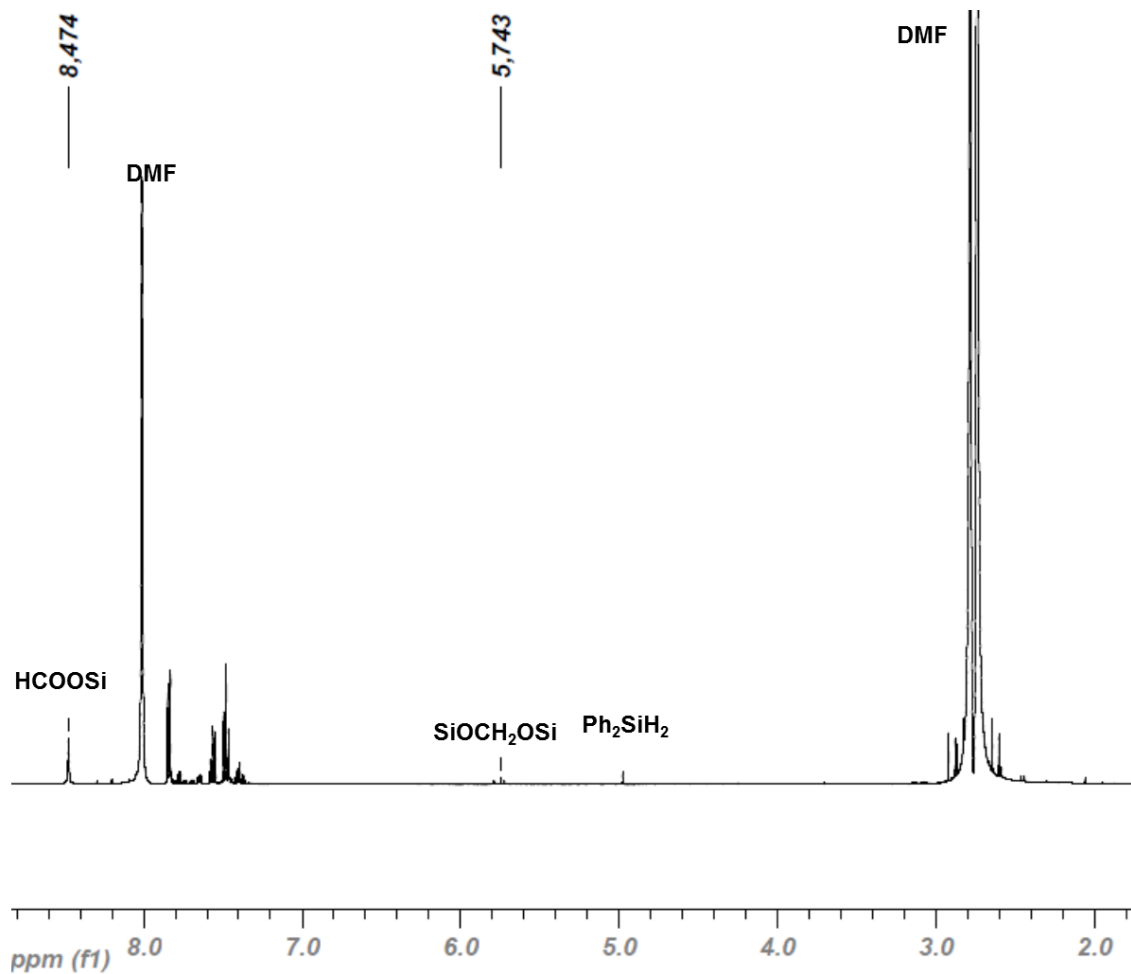

## **S8: General procedures for catalytic tests:**

### **Mother liquor preparation:**

To simplify some manipulations, a 12.5  $\mu\text{mol/ml}$  solution has been prepared by dissolving 17.0 mg of **1** in 5.0 ml (4.74 g) of DMF. It will be referred as mother liquor in the rest of this section.

### **Various loading of $\text{Ph}_2\text{SiH}_2$ using **1** as catalyst (entry 1,3 and 4 of table 1 in main text):**

#### **Entry 1:**

17 mg (62.5  $\mu\text{mol}$ ) of **1** and 460 mg (2.5 mmol) of  $\text{Ph}_2\text{SiH}_2$  have been weighed in a vial and 5 ml of DMF have been added. The solution was then transferred to a Schlenk flask.  $\text{CO}_2$  was added by freezing in a liquid nitrogen bath and leaving the sample under vacuum for *ca* 3 minutes. The liquid nitrogen bath was removed and sample left to warm up for *ca* 20 seconds after which  $\text{CO}_2$  was introduced in the Schlenk flask. Sample was then allowed to warmup to r.t. in *ca* 5 min by stirring in a r.t. water bath and then left with stirring at r.t. under  $\text{CO}_2$  flow. Aliquots were taken at different time interval, dissolved in benzene- $d_6$ , and analysed by  $^1\text{H}$  NMR spectroscopy. We also performed blanks, one without catalyst and one without catalyst and  $\text{CO}_2$ . The results are discussed in main text.

**Entry 3:** 400  $\mu\text{L}$  of mother liquor (5  $\mu\text{mol}$  of **1**) and 922 mg (5 mmol) of  $\text{Ph}_2\text{SiH}_2$  have been diluted with 10 ml of DMF and the solution was then transferred to a Schlenk flask.  $\text{CO}_2$  has been added in the same manner as for Entry 1. Aliquots were taken at different time interval, dissolved in  $\text{C}_6\text{D}_6$ , and analysed by  $^1\text{H}$  NMR spectroscopy.

**Entry 4:** 80  $\mu\text{L}$  of mother liquor (1  $\mu\text{mol}$  of **1**) and 922 mg (5 mmol) of  $\text{Ph}_2\text{SiH}_2$  have been diluted with 10 ml of DMF and the solution was then transferred to a Schlenk flask.  $\text{CO}_2$  has been added in the same manner as for Entry 1. Aliquots were taken at different time interval, dissolved in benzene- $d_6$ , and analysed by  $^1\text{H}$  NMR spectroscopy.

### **Solvent screening (entry 6-8 of table 1 in main text):**

3.4 mg (12.5  $\mu\text{mol}$ ) of **1** and 92.2 mg of  $\text{Ph}_2\text{SiH}_2$  (0.5 mmol) have been weighted in vial and 1 ml of various solvents (DMF,  $\text{CH}_3\text{CN}$  or Toluene) have been added. Then,  $\text{CO}_2$  was bubbled through the solution for approximately 15 seconds after what the solutions were left with stirring at r.t. under one atmosphere of  $\text{CO}_2$  using balloons. After 4 hours of reaction,  $\text{C}_6\text{D}_6$  was added and the solutions were analyzed by  $^1\text{H}$  NMR spectroscopy.

In the case of  $\text{CH}_3\text{CN}$  good conversion was observed so more complete tests have been run with the same method as for DMF (see Entry 1). The first one (80eq) using 17 mg (62.5  $\mu\text{mol}$ ) of **1**, 460 mg (2.5 mmol) of  $\text{Ph}_2\text{SiH}_2$  and 5 ml of  $\text{CH}_3\text{CN}$  and a second one (1000 eq) using 17 mg (62.5  $\mu\text{mol}$ ) of **1**, 460 mg (2.5 mmol) of  $\text{Ph}_2\text{SiH}_2$  and 5 ml of  $\text{CH}_3\text{CN}$ . It is the results of those tests that are reported in table 1 in main text.

We also performed blanks, one without catalyst and one without catalyst and  $\text{CO}_2$ , both showing no conversion of  $\text{Ph}_2\text{SiH}_2$  after 24h.

### **Silane screening (entry 3-5 of table 1 in main text):**

Silanes have been screened in a similar manner using the mother liquor. 0.1 mmol of Si-H (80 eq) have been weighted in a vial and 1ml of mother liquor, (12.5  $\mu\text{mol}$  of **1**) have been added. Then,  $\text{CO}_2$  was bubbled through the solution for approximately 15 seconds after what the solutions were left with stirring under one atmosphere of  $\text{CO}_2$  using balloons. After 4 hours of reaction, benzene- $d_6$  was added and the solutions were analyzed by  $^1\text{H}$  NMR spectroscopy. Since the conversion using  $(\text{EtO})_3\text{SiH}$  and  $\text{Et}_3\text{SiH}$  were very low after only 4h, we perform another experiment with higher **1** loading in a J-Young NMR tube. Briefly, 2.8 mg of **1** (10.2  $\mu\text{mol}$ ) and 400  $\mu\text{mol}$  of silane (65.7 mg for  $(\text{EtO})_3\text{SiH}$  and 46.5 mg for  $\text{Et}_3\text{SiH}$ ) have been weighted in vials. Then 0.4 ml of DMF and 5-6 drops of  $\text{C}_6\text{D}_6$  have been added. The solution was introduced into a gas tight J-Young NMR tube.  $\text{CO}_2$  was added by freezing in a liquid nitrogen bath and leaving the sample under vacuum for *ca* 3 minutes. The liquid nitrogen bath was removed and sample left to warm up for *ca* 20 seconds after which *ca* 3 atm of  $\text{CO}_2$  was introduced in the tube. The reactions were left at r.t. and monitored at various time intervals by  $^1\text{H}$  NMR spectroscopy. The results obtained after 24h are reported in the table of the article main text.

**Other phosphazenes (entry 9-11 of table 1 in main text):**

Catalytic activities of other phosphazenes (structure 2, 3 and 6) have been tested in J-Young NMR tube with Ph<sub>2</sub>SiH<sub>2</sub>. 5 μmol of phosphazene (1.6 mg for 2, 1.7 mg for 3 and, 1.6 mg for 6) and 400 μmol of Si-H (36.9 mg of Ph<sub>2</sub>SiH<sub>2</sub>) have been weighted in vials. Then 0.4 ml of DMF and 5-6 drops of benzene-*d*<sub>6</sub> have been added. The solution was introduced into a gas tight J-Young NMR tube. CO<sub>2</sub> was added by freezing in a liquid nitrogen bath and leaving the sample under vacuum for *ca* 3 minutes. The liquid nitrogen bath was removed and sample left to warm up for *ca* 20 seconds after which *ca* 3 atm of CO<sub>2</sub> was introduced in the tube. The reactions were left at r.t. and monitored at various time intervals by <sup>1</sup>H NMR spectroscopy.

**Big scale reaction in CH<sub>3</sub>CN:**

50 mg (0.18 mmol) of **1** and 1.33g of Ph<sub>2</sub>SiH<sub>2</sub> (7.2 mmol) have been weighed in vial and transferred to a 100 mL schlenk tube. The compounds were dissolved in CH<sub>3</sub>CN and stirred at r.t. for 24 hours under an atmosphere of CO<sub>2</sub>. Then, the sample was put under a constant flow of dinitrogen after which 2.67 g of Ph<sub>2</sub>SiH<sub>2</sub> (14.4 mmol) was added. The reaction was left to stir at r.t. for 48 hours. A 5mL aliquot was taken from the reaction mixture to which 1 mL of a 10% solution of NaOH in water was added. The resulting mixture was filtered and an internal standard of THF was added and the yield of methanol was determined by GC-FID spectroscopy. GC spectra were recorded on a Hewlett Packard GC-FID 6890 Series with an HP-5 (Crosslinked 5% PHME siloxane) column, using an isotherm at 40°C. Injection volumes were 1 μL. A calibration plot was obtained using three aqueous solutions of THF (1% v/v) containing methanol (0.5, 1 and 2 % v/v) to ensure linearity of the THF/MeOH signal. Yield = 69%

**Figure S7A:** Typical  $^1\text{H}$  NMR spectra: here is shown the spectra for entry 1 in table 1 of the manuscript.

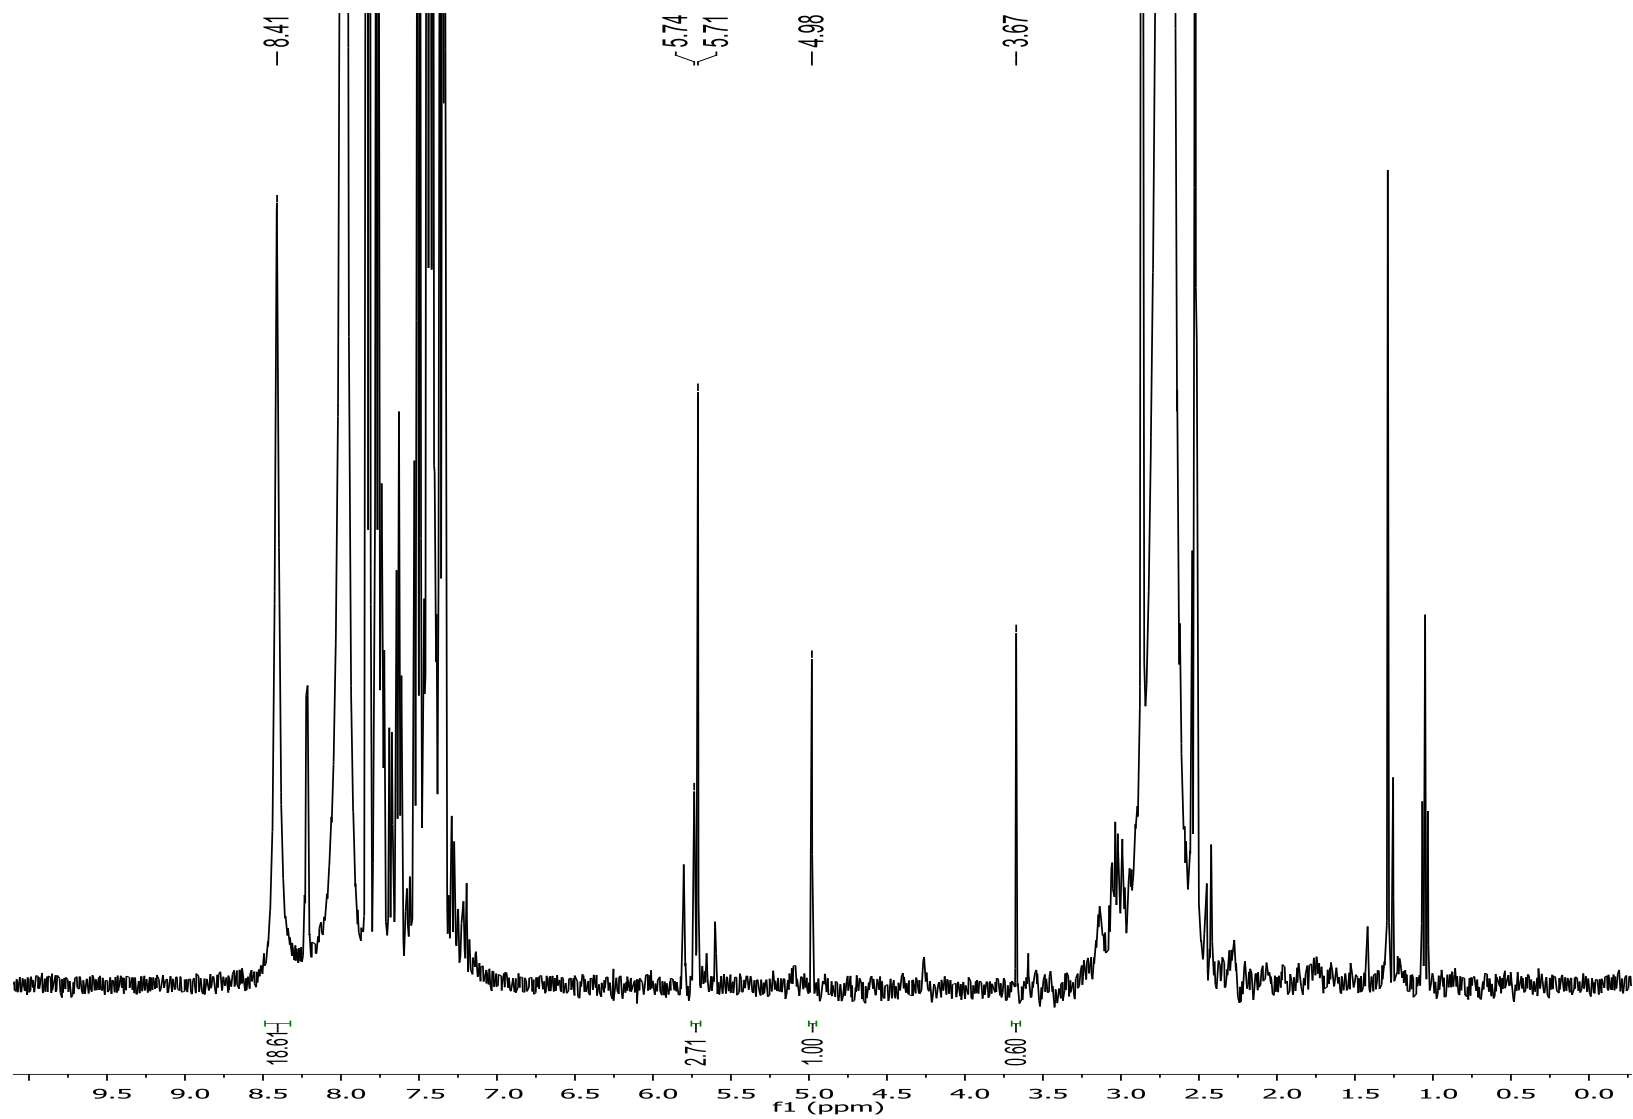

Supplement: c5cc01282a1.pdf [file c5cc01282a1.pdf]
